# Supplementary material
Source: PubMed Central journal article supplement (PMC4938084)
Supplement: rsif20160196supp2.pdf [file rsif20160196supp2.pdf]

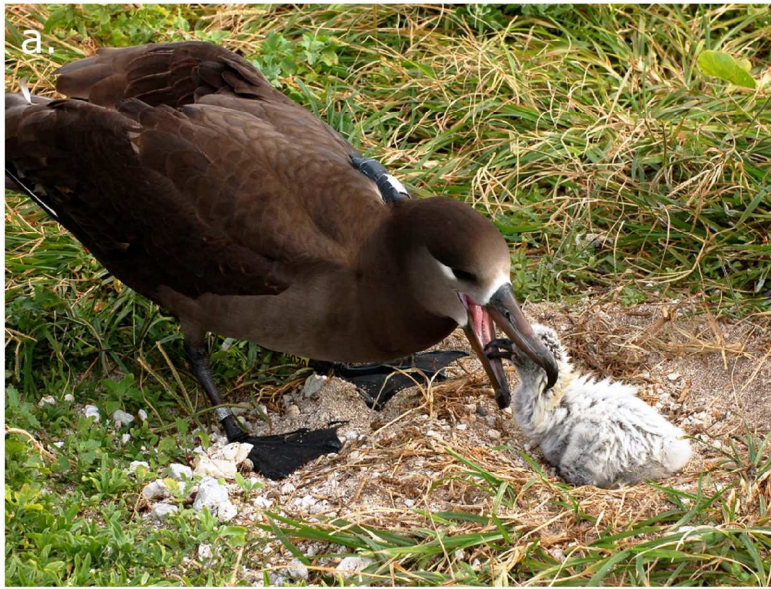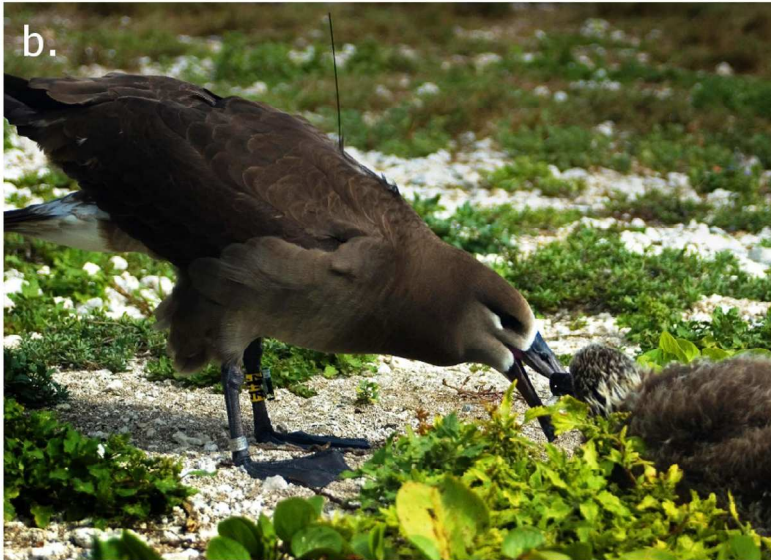

117x173mm (300 x 300 DPI)

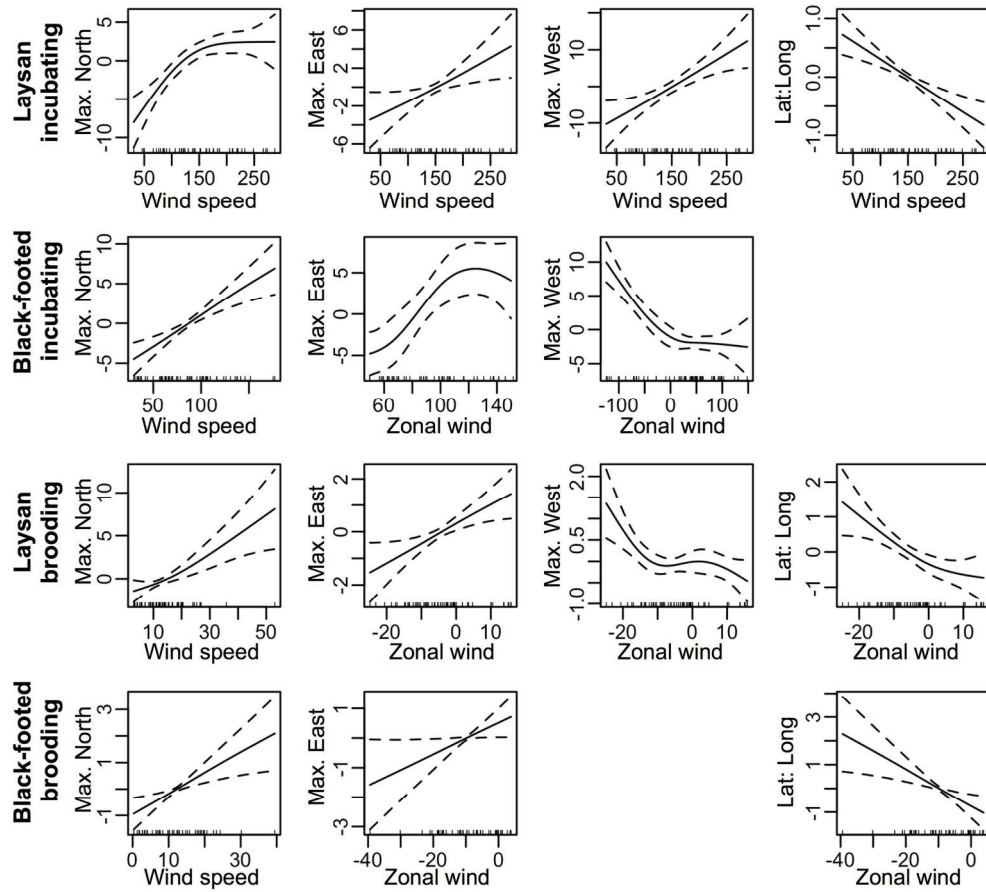

Supplementary Figure 2  
 173x155mm (300 x 300 DPI)

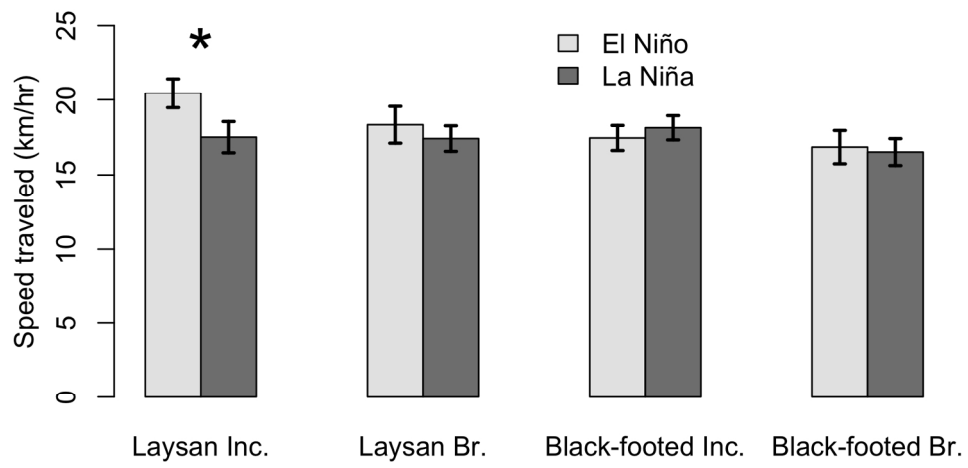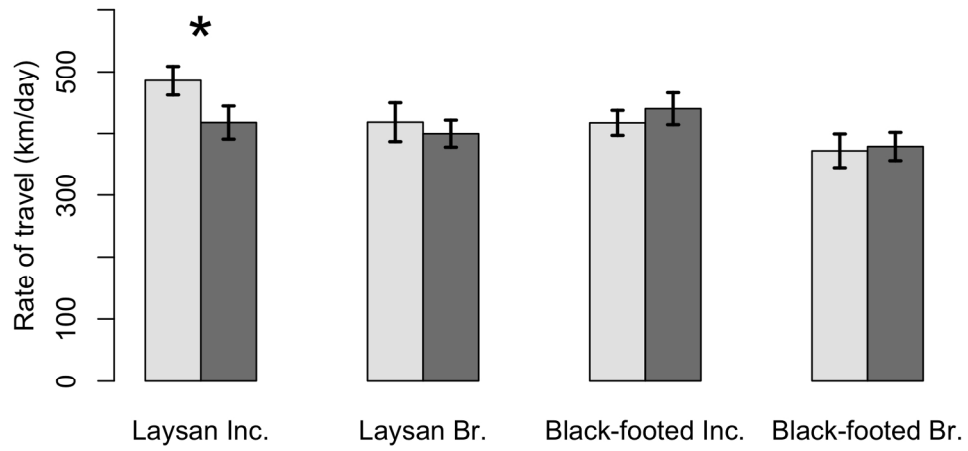

Supplementary Figure 3  
699x699mm (72 x 72 DPI)

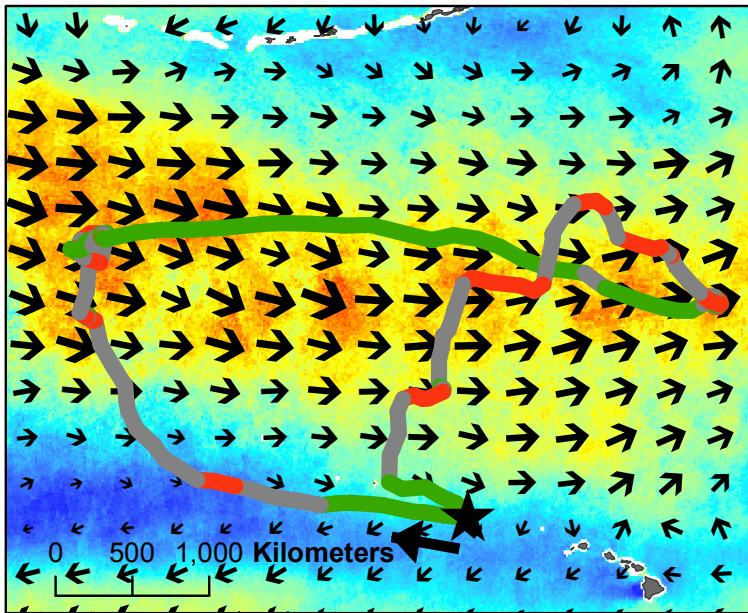

Wind speed  
High : 16  
Low : 1

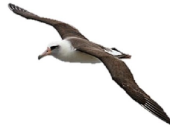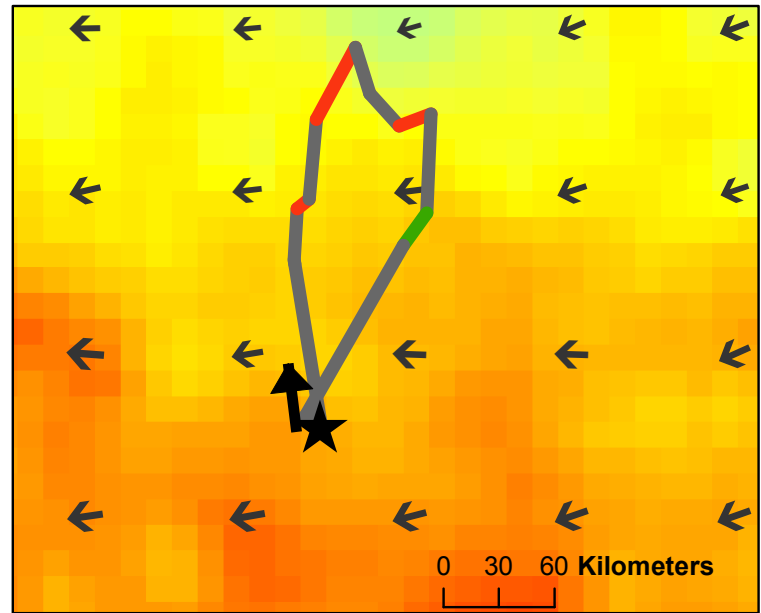

Wind speed  
High : 10  
Low : 1

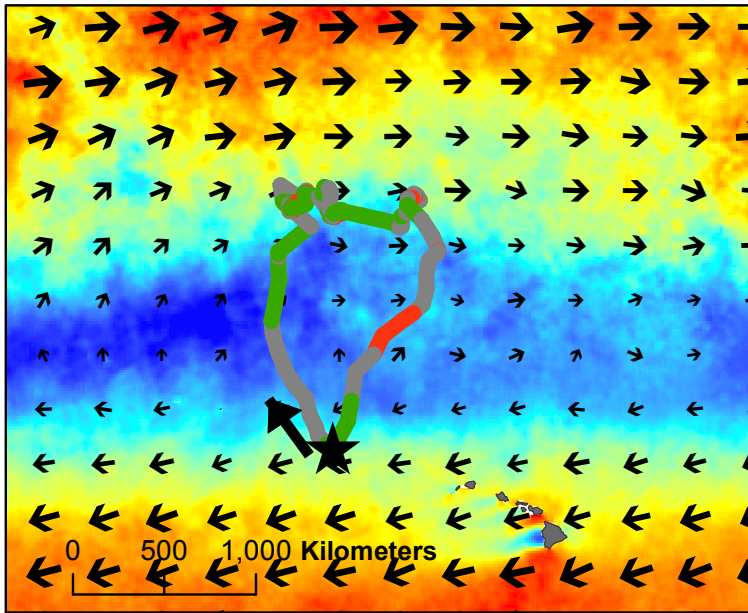

Wind speed  
High : 11  
Low : 1

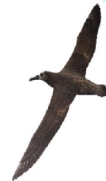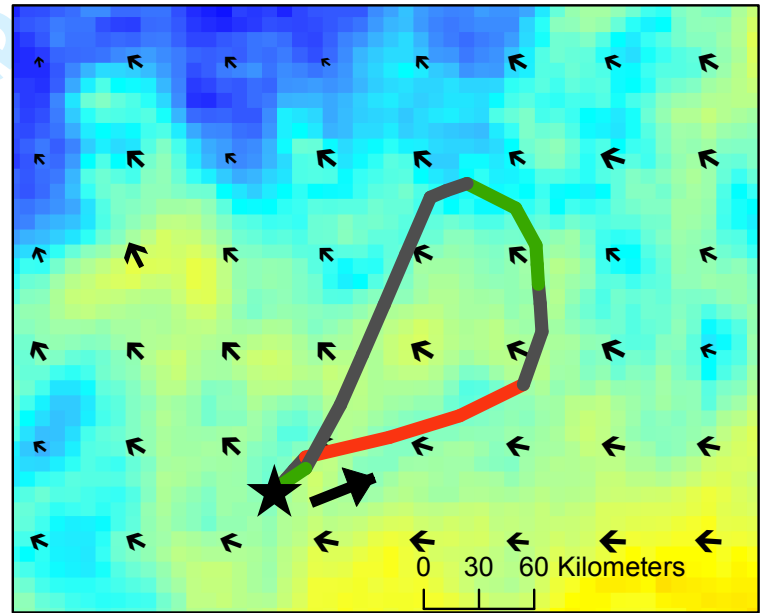

Wind speed  
High : 10  
Low : 1
